# Supplementary material for: Photodetection Properties of MoS2, WS2 and MoxW1-xS2 Heterostructure: A Comparative Study
Source: MDPI journal article supplement (doi:10.3390/nano13010024), 2022-12-21
Supplement: s1 [file s1]

## Photodetection Properties of MoS<sub>2</sub>, WS<sub>2</sub> and Mo<sub>x</sub>W<sub>1-x</sub>S<sub>2</sub> Heterostructure: A Comparative Study

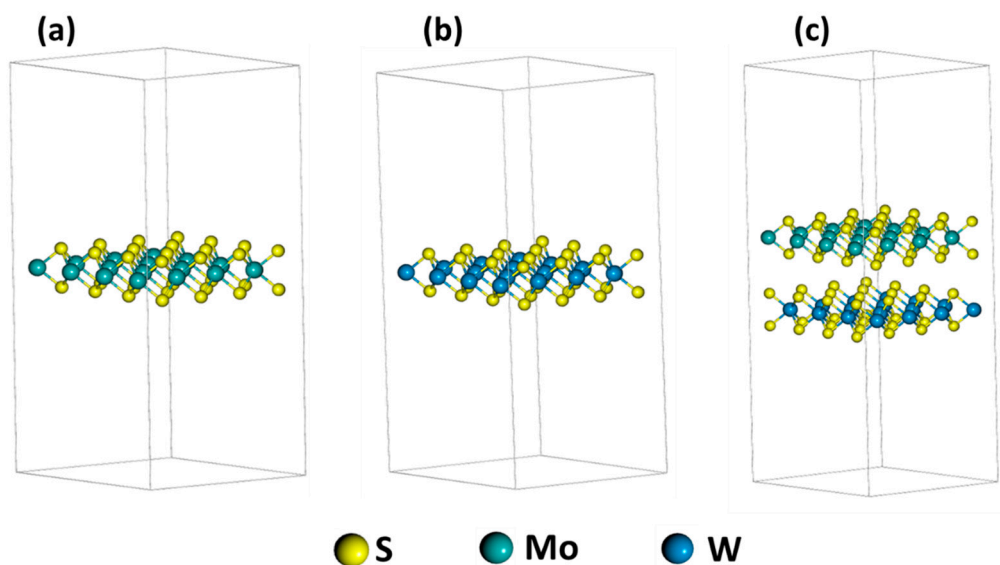

**Figure S1:** Crystals configuration used in DFT for (a) MoS<sub>2</sub>, (b) WS<sub>2</sub> and (c) Mo<sub>x</sub>W<sub>1-x</sub>S<sub>2</sub>

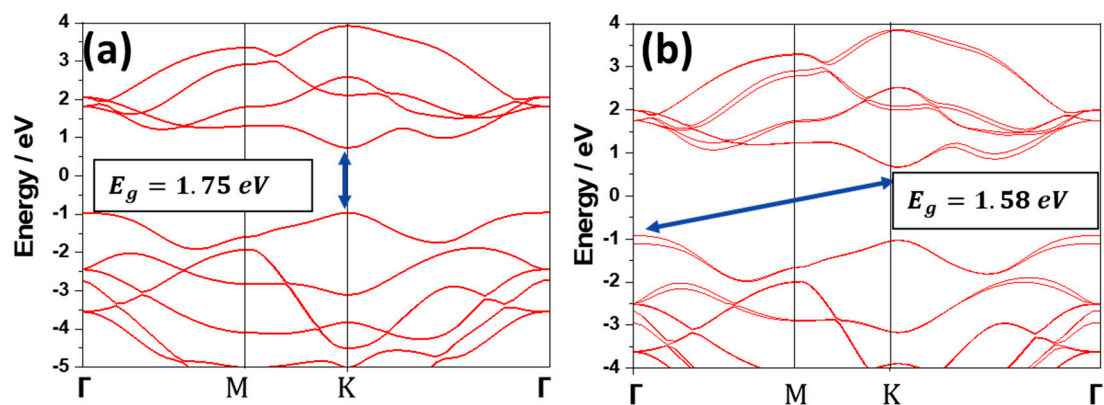

**Figure S2:** Bandgap computed by DFT simulations (a) direct bandgap for monolayer MoS<sub>2</sub>, (b) indirect bandgap for bilayer MoS<sub>2</sub>

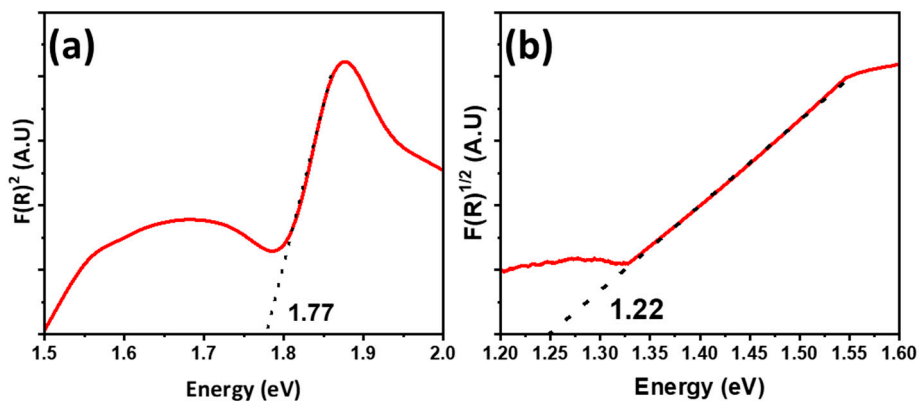

**Figure S3:** Bandgap obtained using Kubelka-Munck model (a) direct bandgap for monolayer MoS<sub>2</sub>, (b) indirect bandgap for bilayer MoS<sub>2</sub>

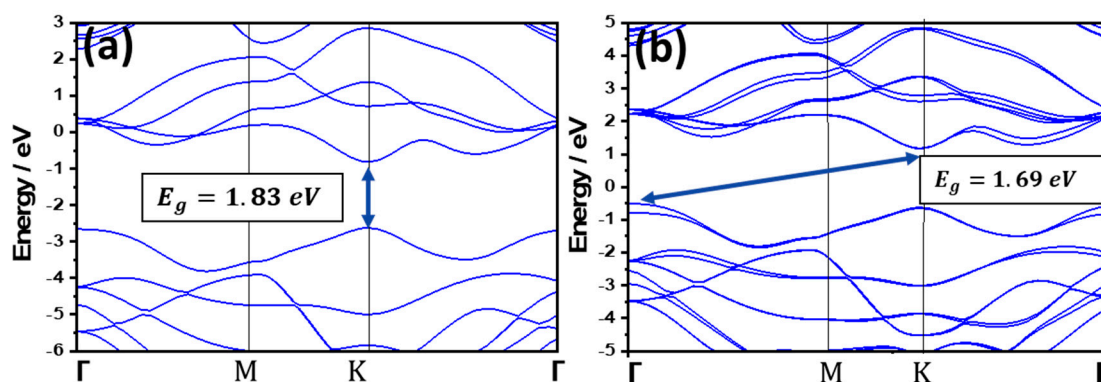

**Figure S4:** Bandgap computed using DFT simulations (a) direct bandgap for monolayer WS<sub>2</sub>, (b) indirect bandgap for bilayer WS<sub>2</sub>

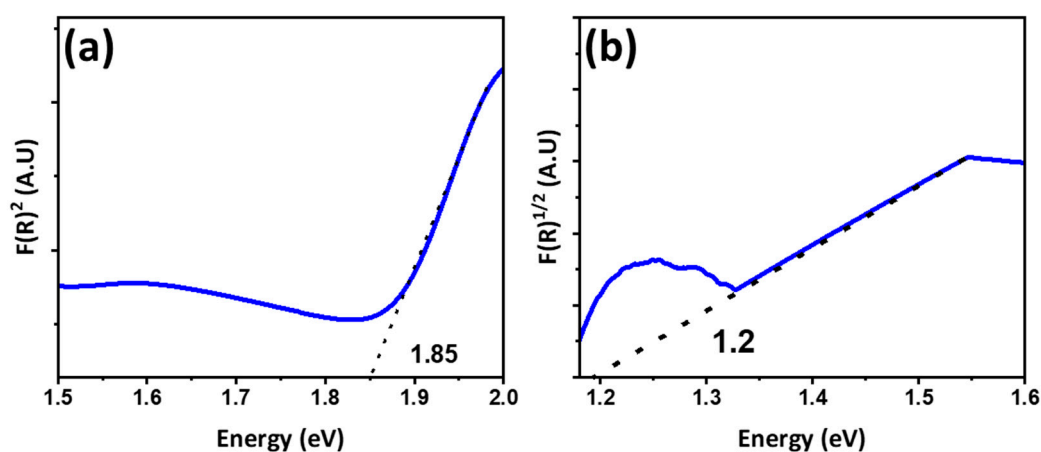

**Figure S5:** Bandgap obtained using Kubelka-Munck model (a) direct bandgap for monolayer WS<sub>2</sub>, (b) indirect bandgap for bilayer WS<sub>2</sub>
